# Supplementary material
Source: PubMed Central journal article supplement (PMC6299476)
Supplement: mbo006184209sf1.pdf [file mbo006184209sf1.pdf]

# Figure S1

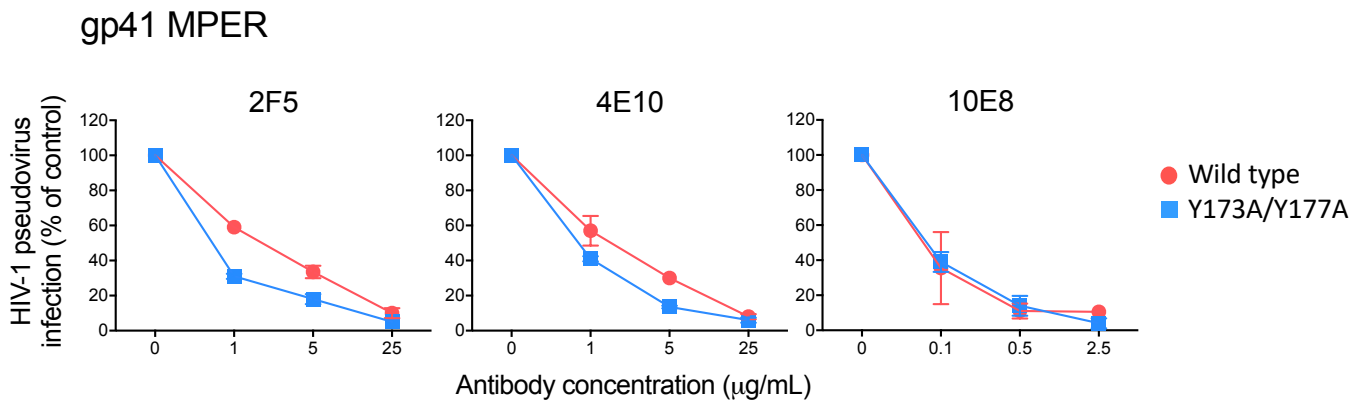

**Figure S1. Effect of V2 tyrosine mutation on neutralization by bNAbs against the gp41 MPER region.** Neutralization sensitivity of the double-alanine mutant HIV-1 BaL Y173A/Y177A (blue) compared to that of the wild-type virus (red). The neutralization tests were performed using the TZMbl assay.
